# Supplementary material for: p-Hydroxylcinnamaldehyde induces the differentiation of oesophageal carcinoma cells via the cAMP-RhoA-MAPK signalling pathway
Source: PubMed Central journal article supplement (PMC4977536; doi:10.1038/srep31315), 2016-08-09
Supplement: srep31315-s1.pdf [file srep31315-s1.pdf]

# ***p*-Hydroxycinnamaldehyde induces the differentiation of oesophageal carcinoma cells via the cAMP-RhoA-MAPK signalling pathway**

Ming Ma <sup>1,2#</sup>, Lian-mei Zhao <sup>2#</sup>, Xing-xiao Yang <sup>3</sup>, Ya-nan Shan <sup>3</sup>, Wen-xuan Cui <sup>2</sup>,  
Liang Chen <sup>2</sup> & Bao-en Shan <sup>2\*</sup>

1 Clinical Laboratory, The Fourth Hospital of Hebei Medical University, Shijiazhuang, Hebei 050011, P. R. China;

2 Research Center, The Fourth Hospital of Hebei Medical University, Shijiazhuang, Hebei 050011, P. R. China.

3 Department of Infection Management, The Fourth Hospital of Hebei Medical University, Shijiazhuang, Hebei 050011, P. R. China;

#Ming Ma and Lian-mei Zhao contributed equally to this work

\* **Correspondence to:** Baoen Shan Professor

E-mail: shanbaoen@163.com

Tel: 86311-86095283

Address: 12# Jiankang road, Shijiazhuang, China

**Supplementary table 1. Primer sequences for reverse transcription-quantitative polymerase chain reaction**

| Gene    | Primer sequence                     | Annealing temperature (°C) |
|---------|-------------------------------------|----------------------------|
| β-actin | Forward 5'-GTTGTGATGGGTCTGA-3'      | 60                         |
|         | Reverse 5'-GAGCAATAGCGTCTGTG-3'     |                            |
| CEA     | Forward 5'-CGCTGAGTTCCTGCGTACC-3'   | 60                         |
|         | Reverse 5'-TCTGCGGTGCTGTTGTGG-3'    |                            |
| SCC     | Forward 5'-GGCTCGATTGTTATTTCCAC -3' | 60                         |
|         | Reverse 5'-GGTTGTAGAATTAAGAATAGC-3' |                            |
| IL-6    | Forward 5'-CCATCCAGTTGCCTTCTTGG-3'  | 60                         |
|         | Reverse 5'-CTCCTCTCCGGACTTGTGAA-3'  |                            |
| MIC-1   | Forward 5'-CCCTGCAGTCCGGATACTC-3'   | 60                         |
|         | Reverse 5'-GAACAGAGCCCGGTGAAG-3'    |                            |

**Supplementary table 2. NMR data of CMSP**

| No. | <sup>1</sup> H NMR                | <sup>13</sup> C NMR |
|-----|-----------------------------------|---------------------|
| 1   | /                                 | 126.369             |
| 2   | 7.47(1H,dd, <i>J</i> =2.5,9.5Hz)  | 117.072             |
| 3   | 6.78(1H, dd, <i>J</i> =2.5,9.5Hz) | 132.008             |
| 4   | /                                 | 162.452             |
| 5   | 6.78(1H, dd, <i>J</i> =2.5,9.5Hz) | 132.008             |
| 6   | 7.47(1H,dd, <i>J</i> =2.5,9.5Hz)  | 117.072             |
| 1'  | 9.50(1H,d, <i>J</i> =8.0Hz)       | 196.184             |
| 2'  | 7.52(1H, d, <i>J</i> =15.5Hz)     | 126.998             |
| 3'  | 6.55(1H, d, <i>J</i> =8.0,16.0Hz) | 156.003             |

Supplementary Figure. 1.

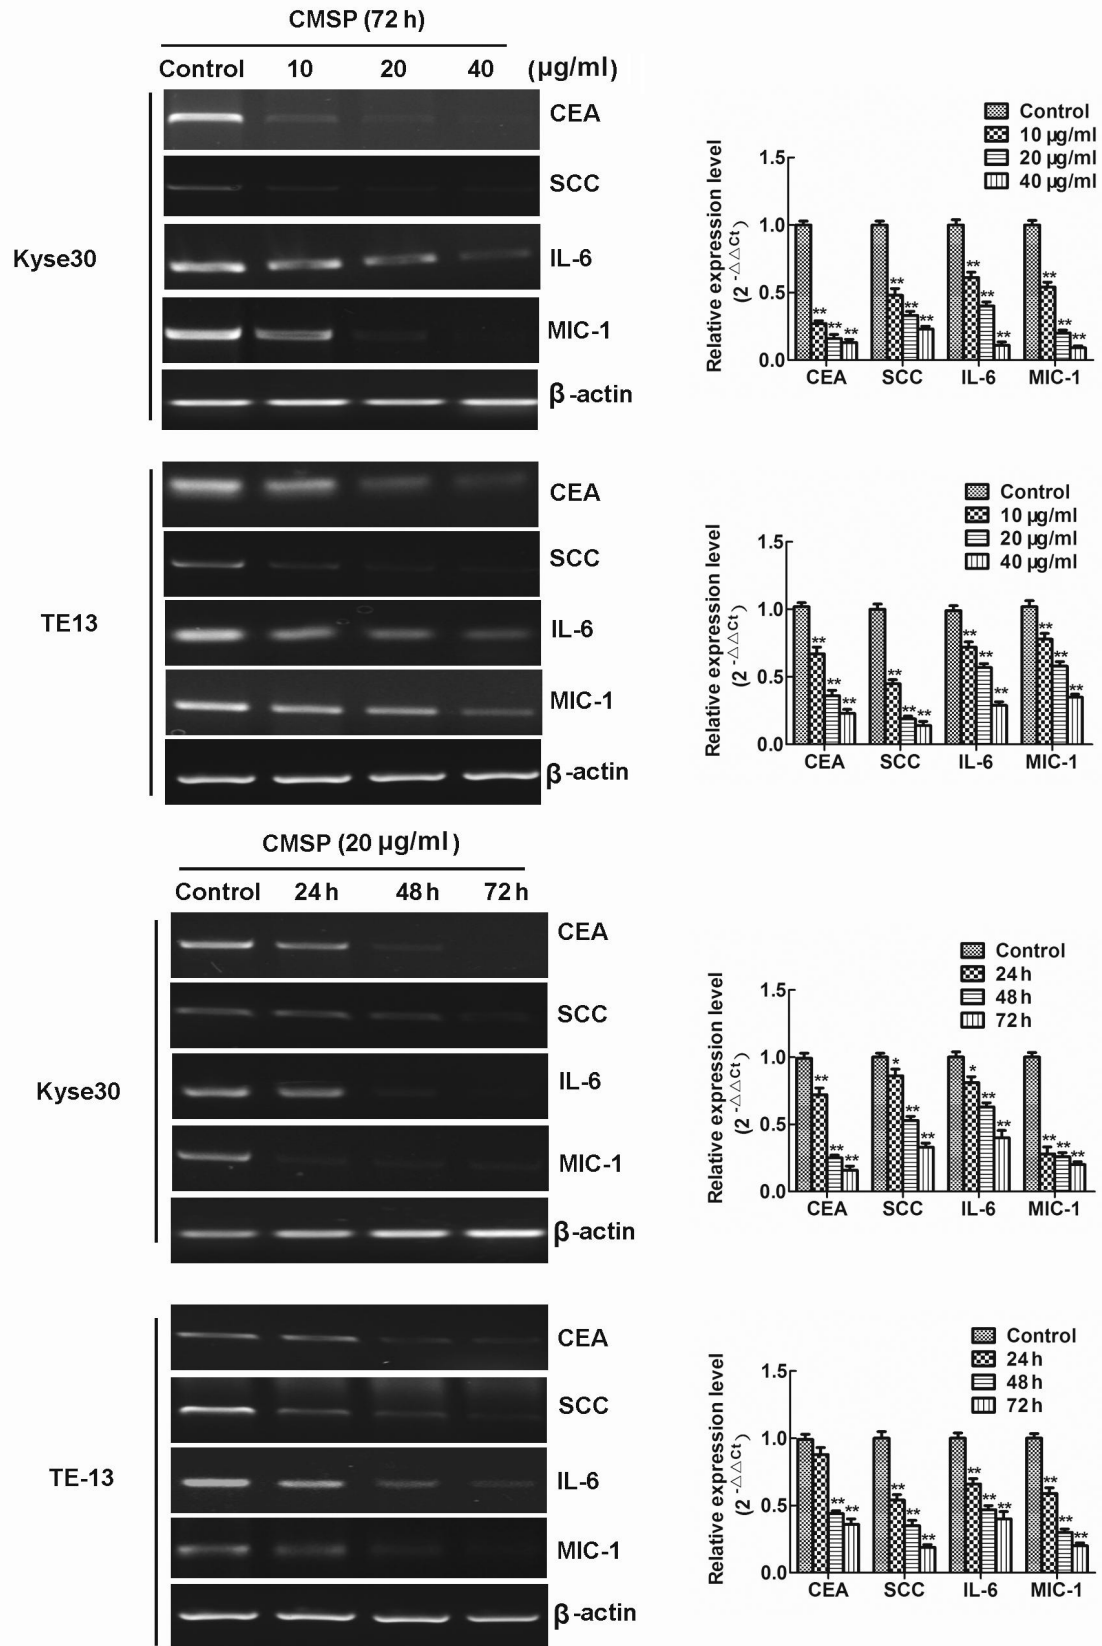

Supplementary Figure. 2.

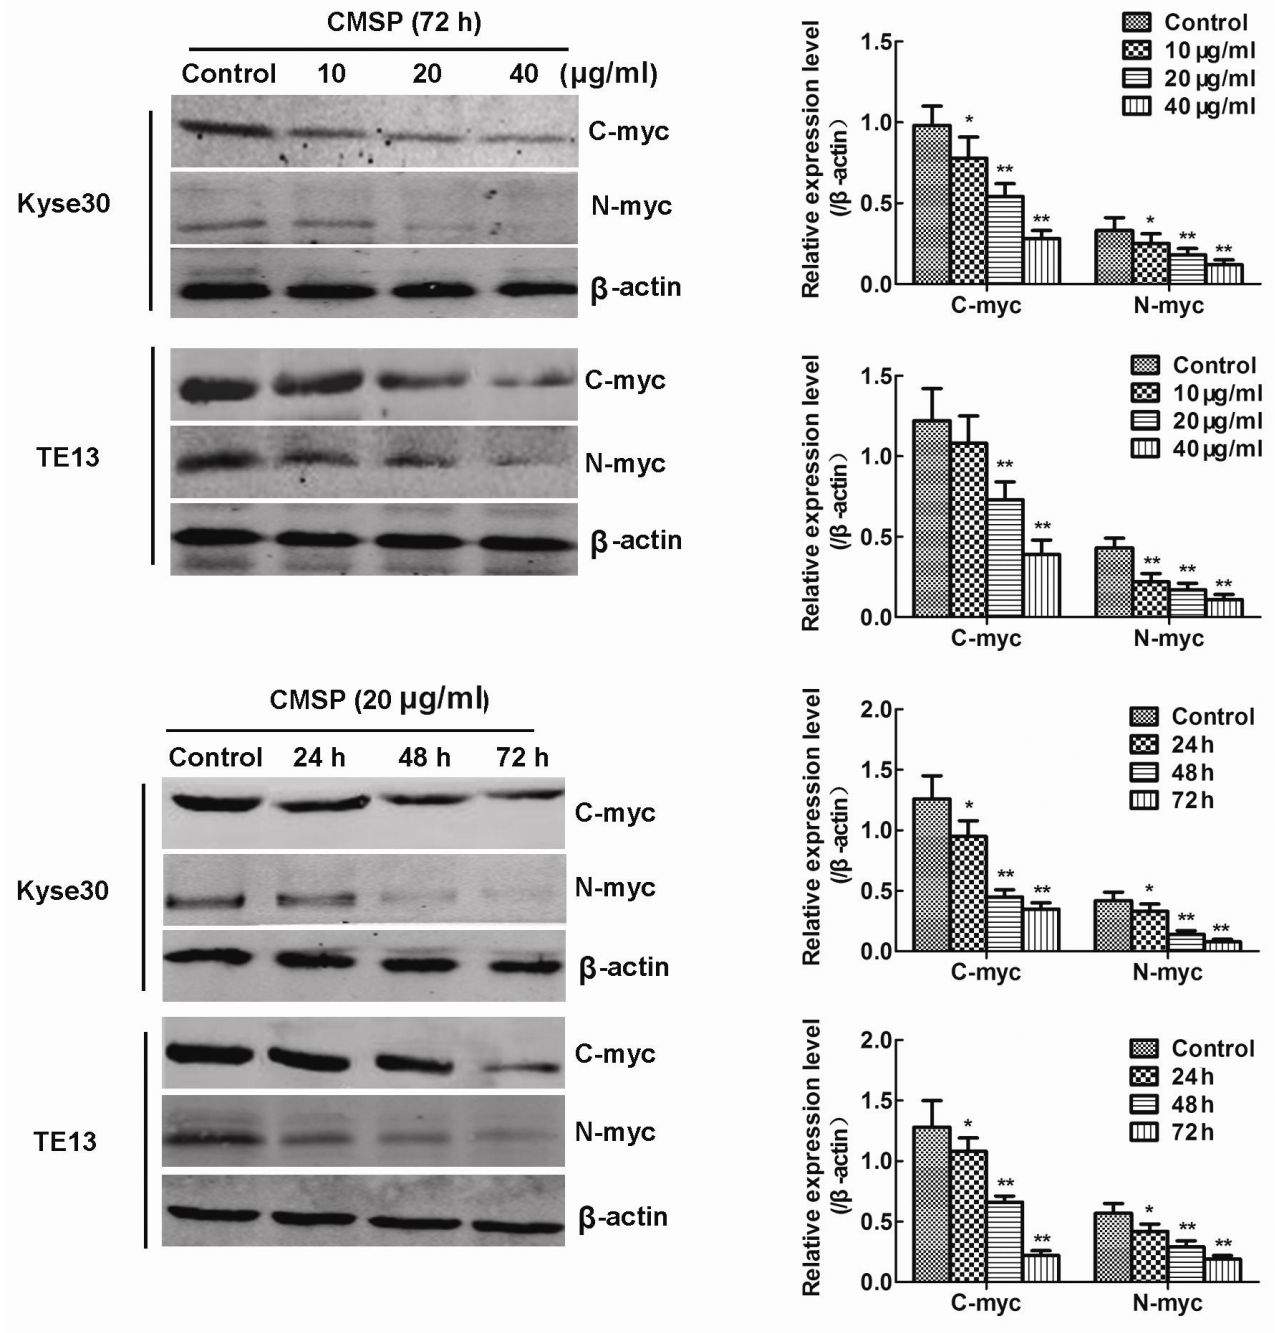

Supplementary Figure. 3.

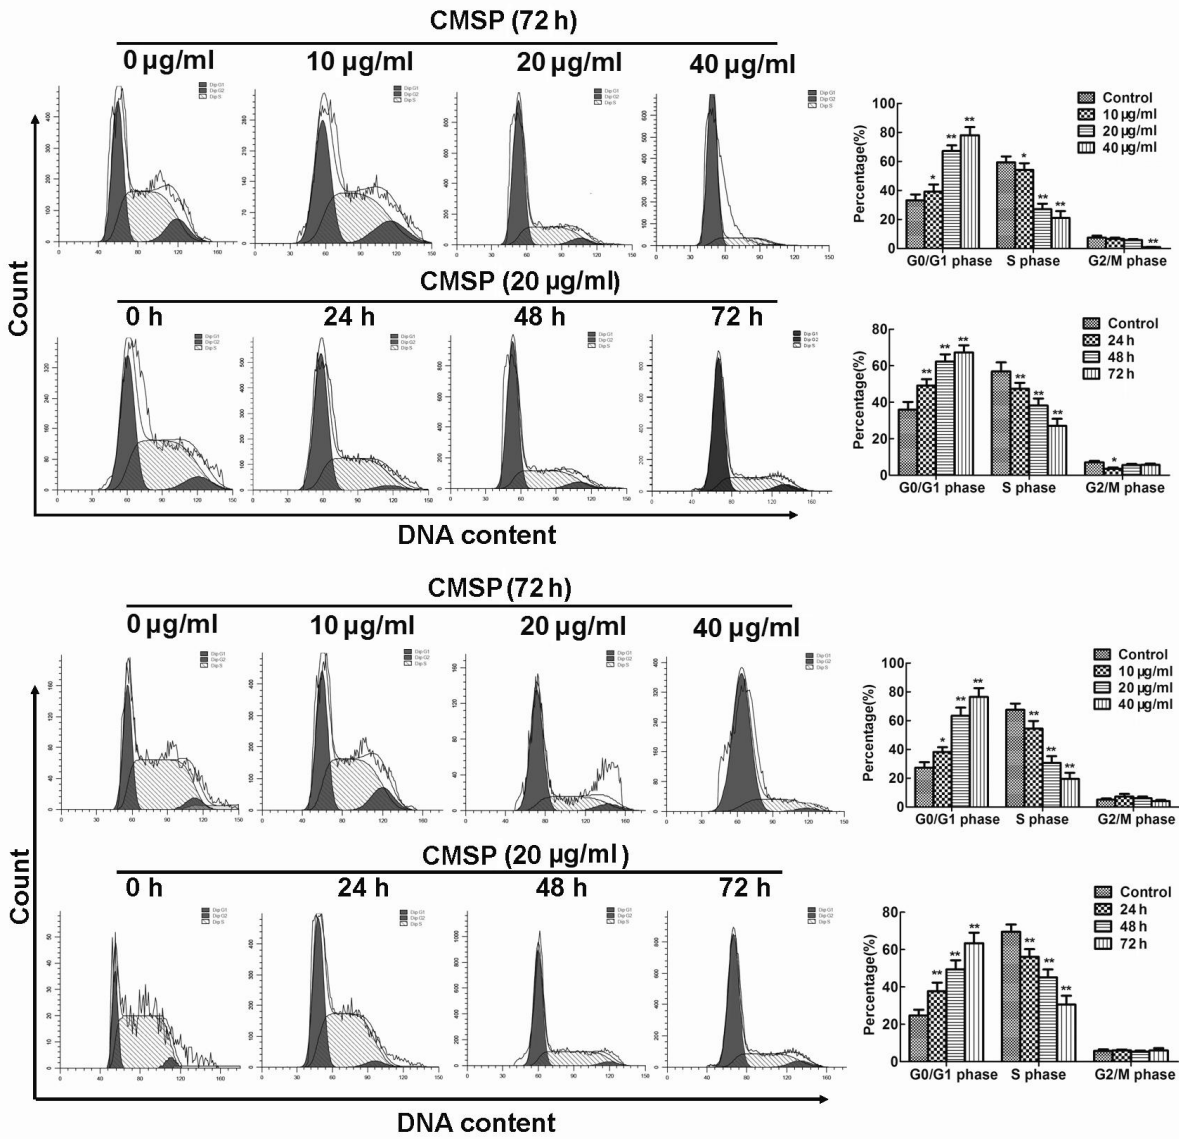

Kyse30

TE-13

Supplementary Figure. 4.

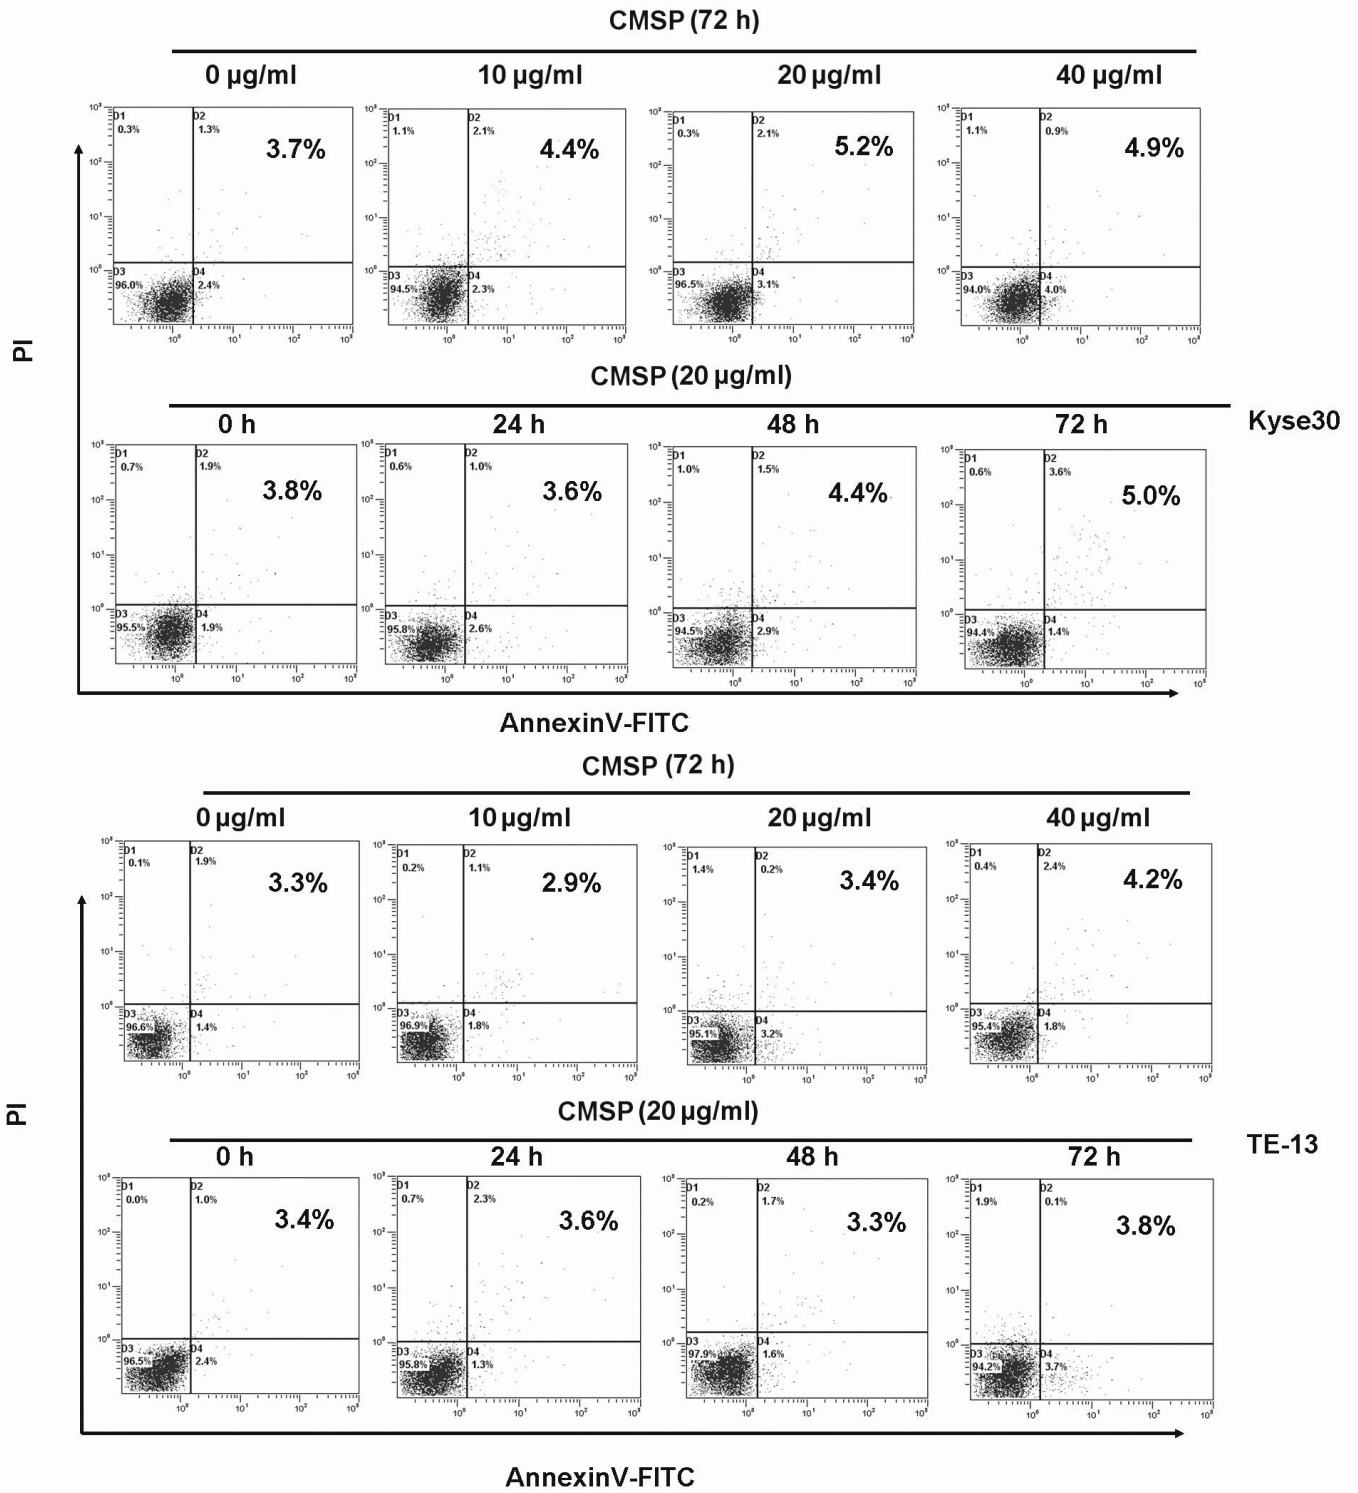

Supplementary Figure. 5.

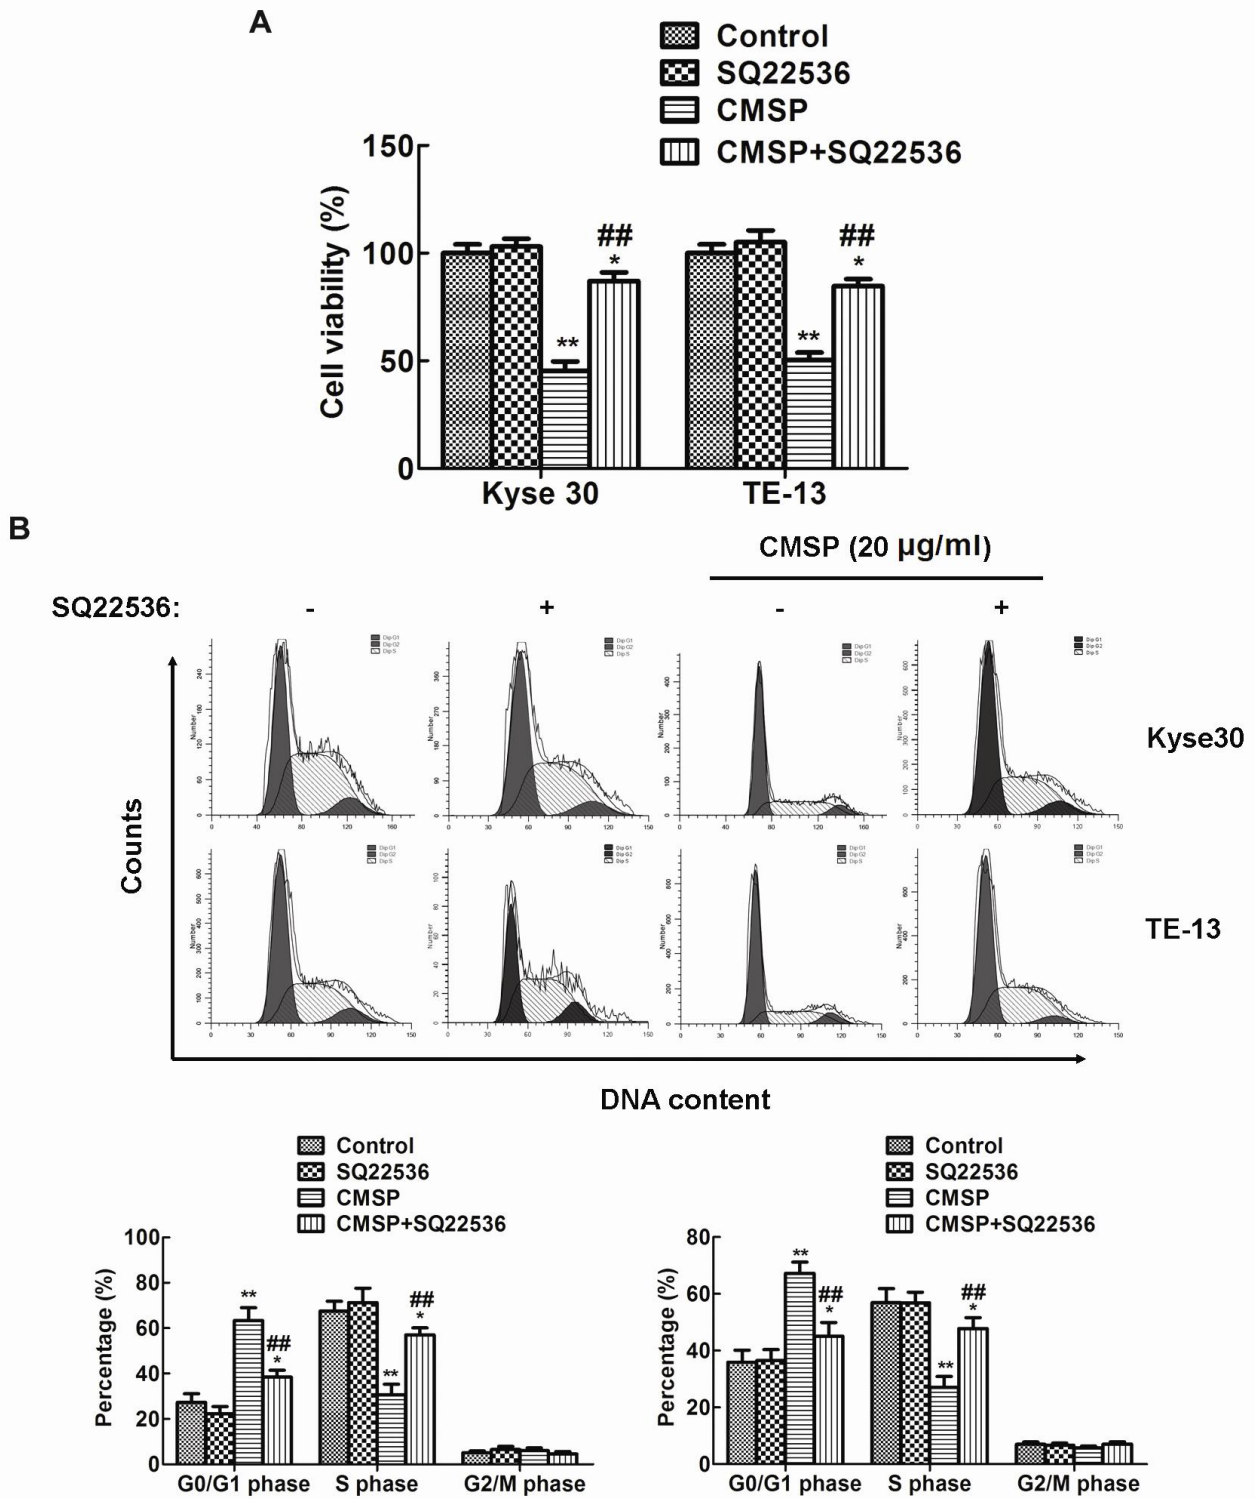

Supplementary Figure. 6.

**A**

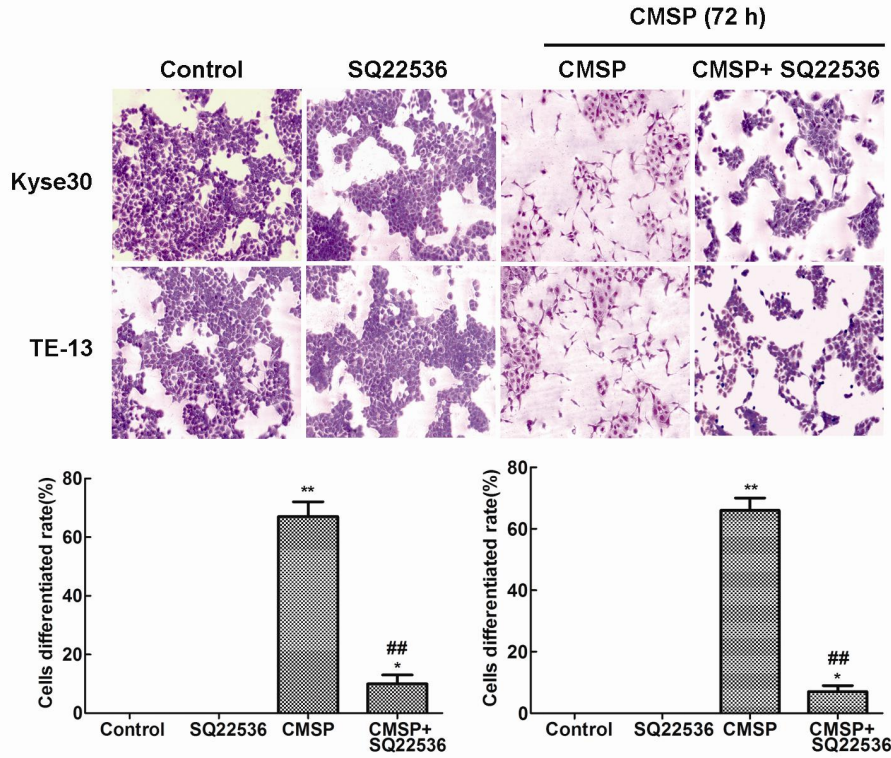

**B**

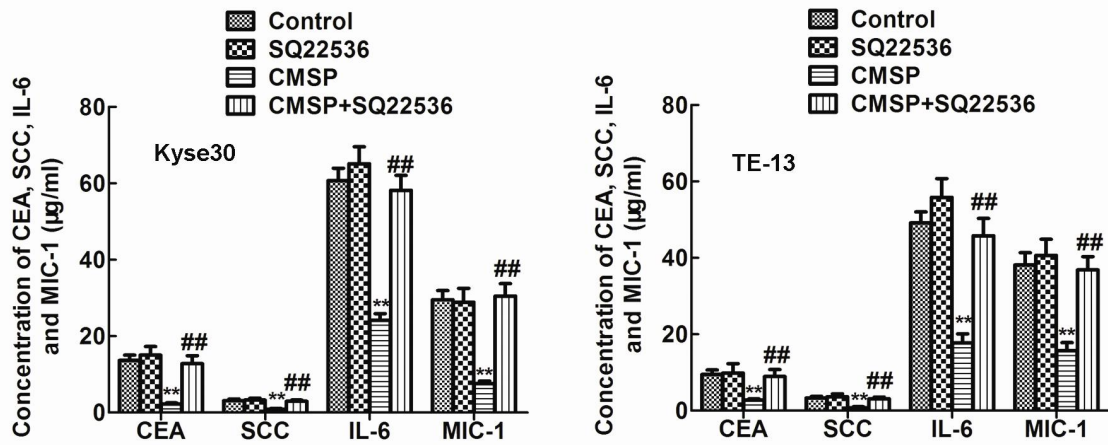

**C**

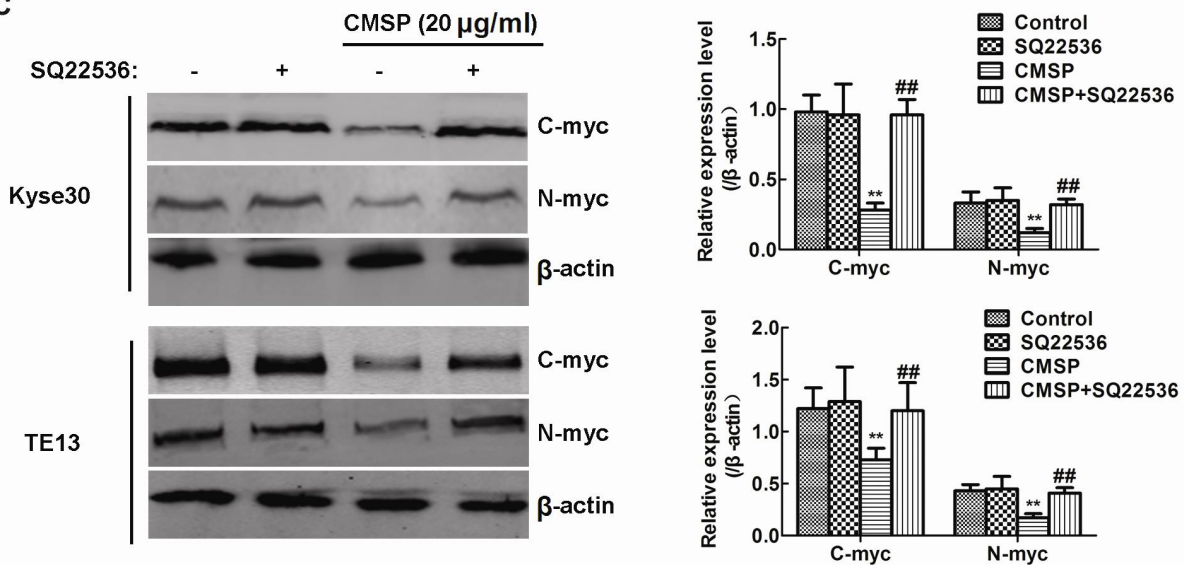



Supplementary Figure. 7.

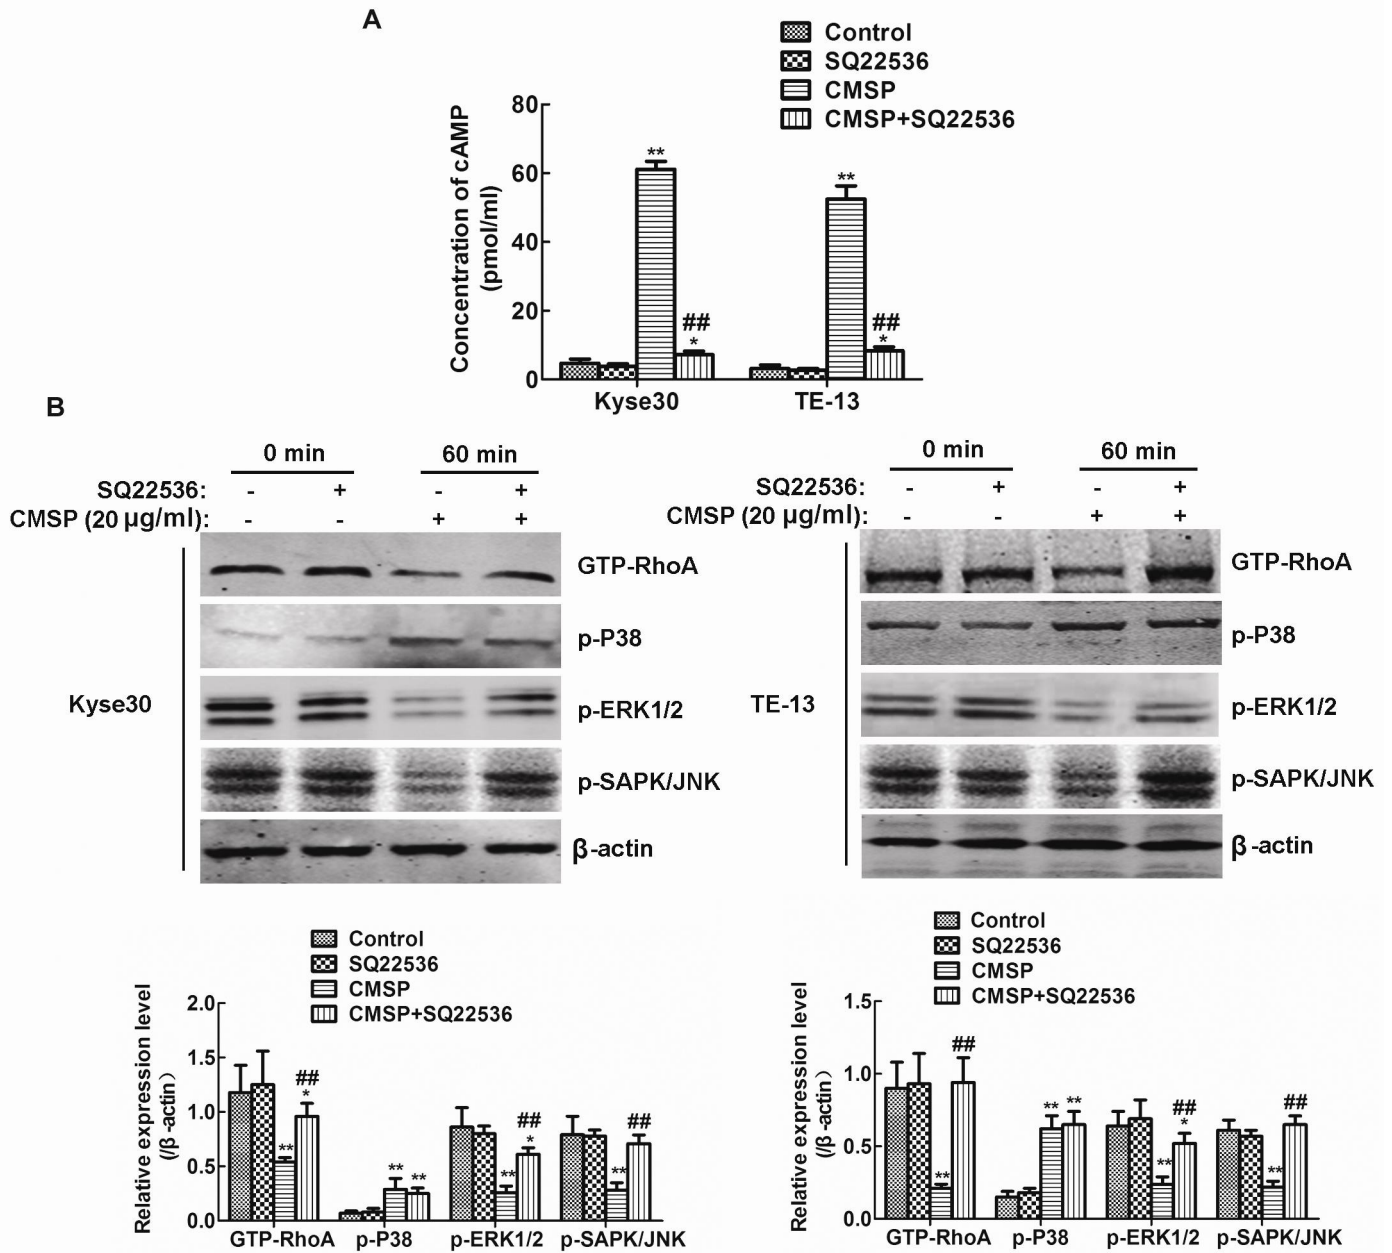

Figure legends

**Supplementary Figure. 1. Effects of CMSP on tumour-related antigen and malignant marker expression of Kyse30 and TE-13 cells following CMSP treatment.**

Expression of CEA, SCC IL-6 and MIC-1 mRNA in Kyse30 and TE-13 cells treated with different concentrations (10, 20 or 40  $\mu$ g/ml) of CMSP was determined using RT-qPCR.  $\beta$ -Actin served as a loading control. The data presented are means $\pm$ SD from at least three independent experiments. \*P<0.05, \*\*P<0.01, compared with the

control group.

**Supplementary Figure. 2. Effects of CMSP on C-myc and N-myc expression in Kyse30 and TE-13 cells following exposure to CMSP.**

The expression levels of C-myc and N-myc, two malignant markers of tumours, in Kyse30 and TE-13 cells treated with different concentrations (10, 20 or 40 µg/ml) of CMSP were determined by western blotting. β-Actin served as a loading control. The data presented are means±SD from at least three independent experiments. \*P<0.05, \*\*P<0.01, compared with the control group.

**Supplementary Figure. 3. Effects of CMSP on the cell cycle distribution of Kyse30 and TE-13 cells.**

Effect of CMSP on the cell cycle distribution of Kyse30 and TE-13 cells detected by FCM analysis. Representative histograms of PI-stained cells. The data presented are means±SD from at least three independent experiments. \*P<0.05, \*\*P<0.01, compared with the control group.

**Supplementary Figure. 4. Effects of CMSP on the apoptosis of Kyse30 and TE-13 cells.**

The effect of CMSP on the apoptotic rates of Kyse30 and TE-13 cells was detected by flow cytometry analysis.

**Supplementary Figure. 5. Effects of inhibitor of cAMP on CMSP-mediated proliferation inhibition and cycle arrest of Kyse30 and TE-13 cells.**

(A) Effect of SQ22536 on proliferation inhibition of Kyse30 and TE-13 cells induced by 20 µg/ml CMSP for 72 h. The data presented are means±SD from at least three independent experiments. \*P<0.05, \*\*P<0.01, compared with the control group. #P<0.05, ##P<0.01, compared with the CMSP group.

(B) Effect of SQ22536 on cycle arrest of Kyse30 and TE-13 cells induced by 20 µg/ml CMSP for 72 h. The data presented are means±SD from at least three independent experiments. \*P<0.05, \*\*P<0.01, compared with the control group. ##P<0.01, compared with the CMSP group.

**Supplementary Figure. 6. Effects of inhibitor of cAMP on CMSP-mediated morphology changes and differentiation of Kyse30 and TE-13 cells.**

(A) Effect of inhibitor for cAMP (SQ22536) on morphology changes of Kyse30 and TE-13 cells induced by 20 µg/ml CMSP for 72 h. (×100).

(B) Effect of SQ22536 on CEA, SCC, IL-6 and MIC-1 secretion inhibition of Kyse30 and TE-13 cells mediated by 20 µg/ml CMSP for 72 h. The data presented are means±SD from at least three independent experiments. \*P<0.05, \*\*P<0.01, compared with the control group. ##P<0.01, compared with the CMSP group.

(C) Effect of SQ22536 on expression levels of C-myc and N-myc, two malignant markers of tumours, in Kyse30 and TE-13 cells treated with 20 µg/ml CMSP for 72 h. The data presented are means±SD from at least three independent experiments.

\*P<0.05, \*\*P<0.01, compared with the control group. ##P<0.01, compared with the CMSP group.

**Supplementary Figure. 7. Effects of SQ22536 on GTP-RhoA expression and the phosphorylation of MAPKs in Kyse30 and TE-13 cells treated with CMSP.**

(A) Effect of SQ22536 on cAMP secretion of Kyse30 and TE-13 cells treated with 20 µg/ml CMSP for 60 min. The data presented are means±SD from at least three independent experiments. \*P<0.05, \*\*P<0.01, compared with the control group. ##P<0.01, compared with the CMSP group.

(B) The effect of SQ22536 on expression changes of GTP-RhoA, phosphorylated ERK, p38, and JNK kinase proteins mediated by CMSP were assayed by western blotting. β-Actin was used as an internal control. The data presented are means±SD from at least three independent experiments. \*P<0.05, \*\*P<0.01, compared with the control group. ##P<0.01, compared with the CMSP group.
